# Supplementary material for: Involvement of GPx-3 in the Reciprocal Control of Redox Metabolism in the Leukemic Niche
Source: MDPI journal article supplement (doi:10.3390/ijms21228584), 2020-11-14
Supplement: s1 [file s1]

## differentiation capacities of bone marrow MSCs

adipogenic

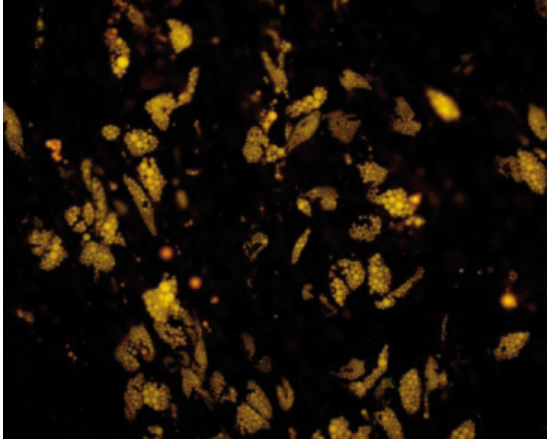

osteogenic

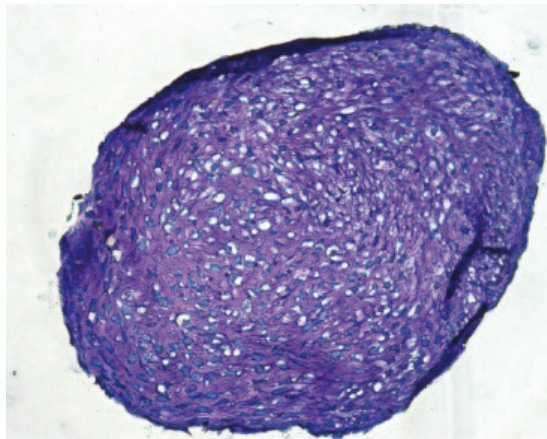

chondrogenic

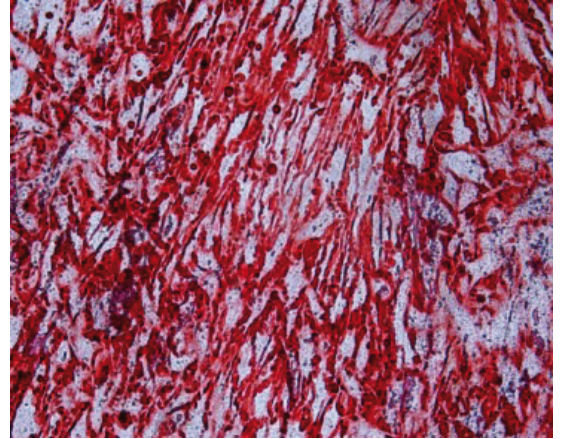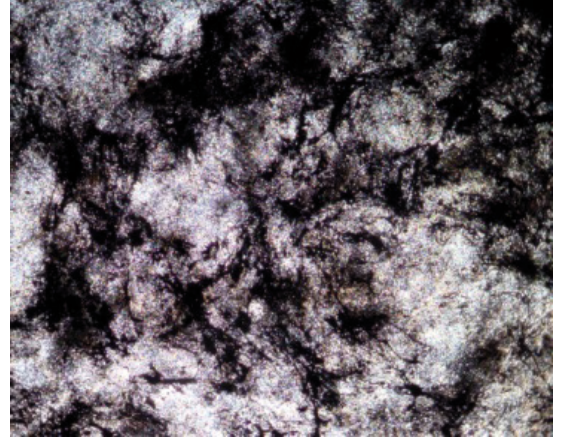

Figure S3
