# Supplementary figures and images for: Involvement of GPx-3 in the Reciprocal Control of Redox Metabolism in the Leukemic Niche
Source: MDPI journal article supplement (doi:10.3390/ijms21228584), 2020-11-14

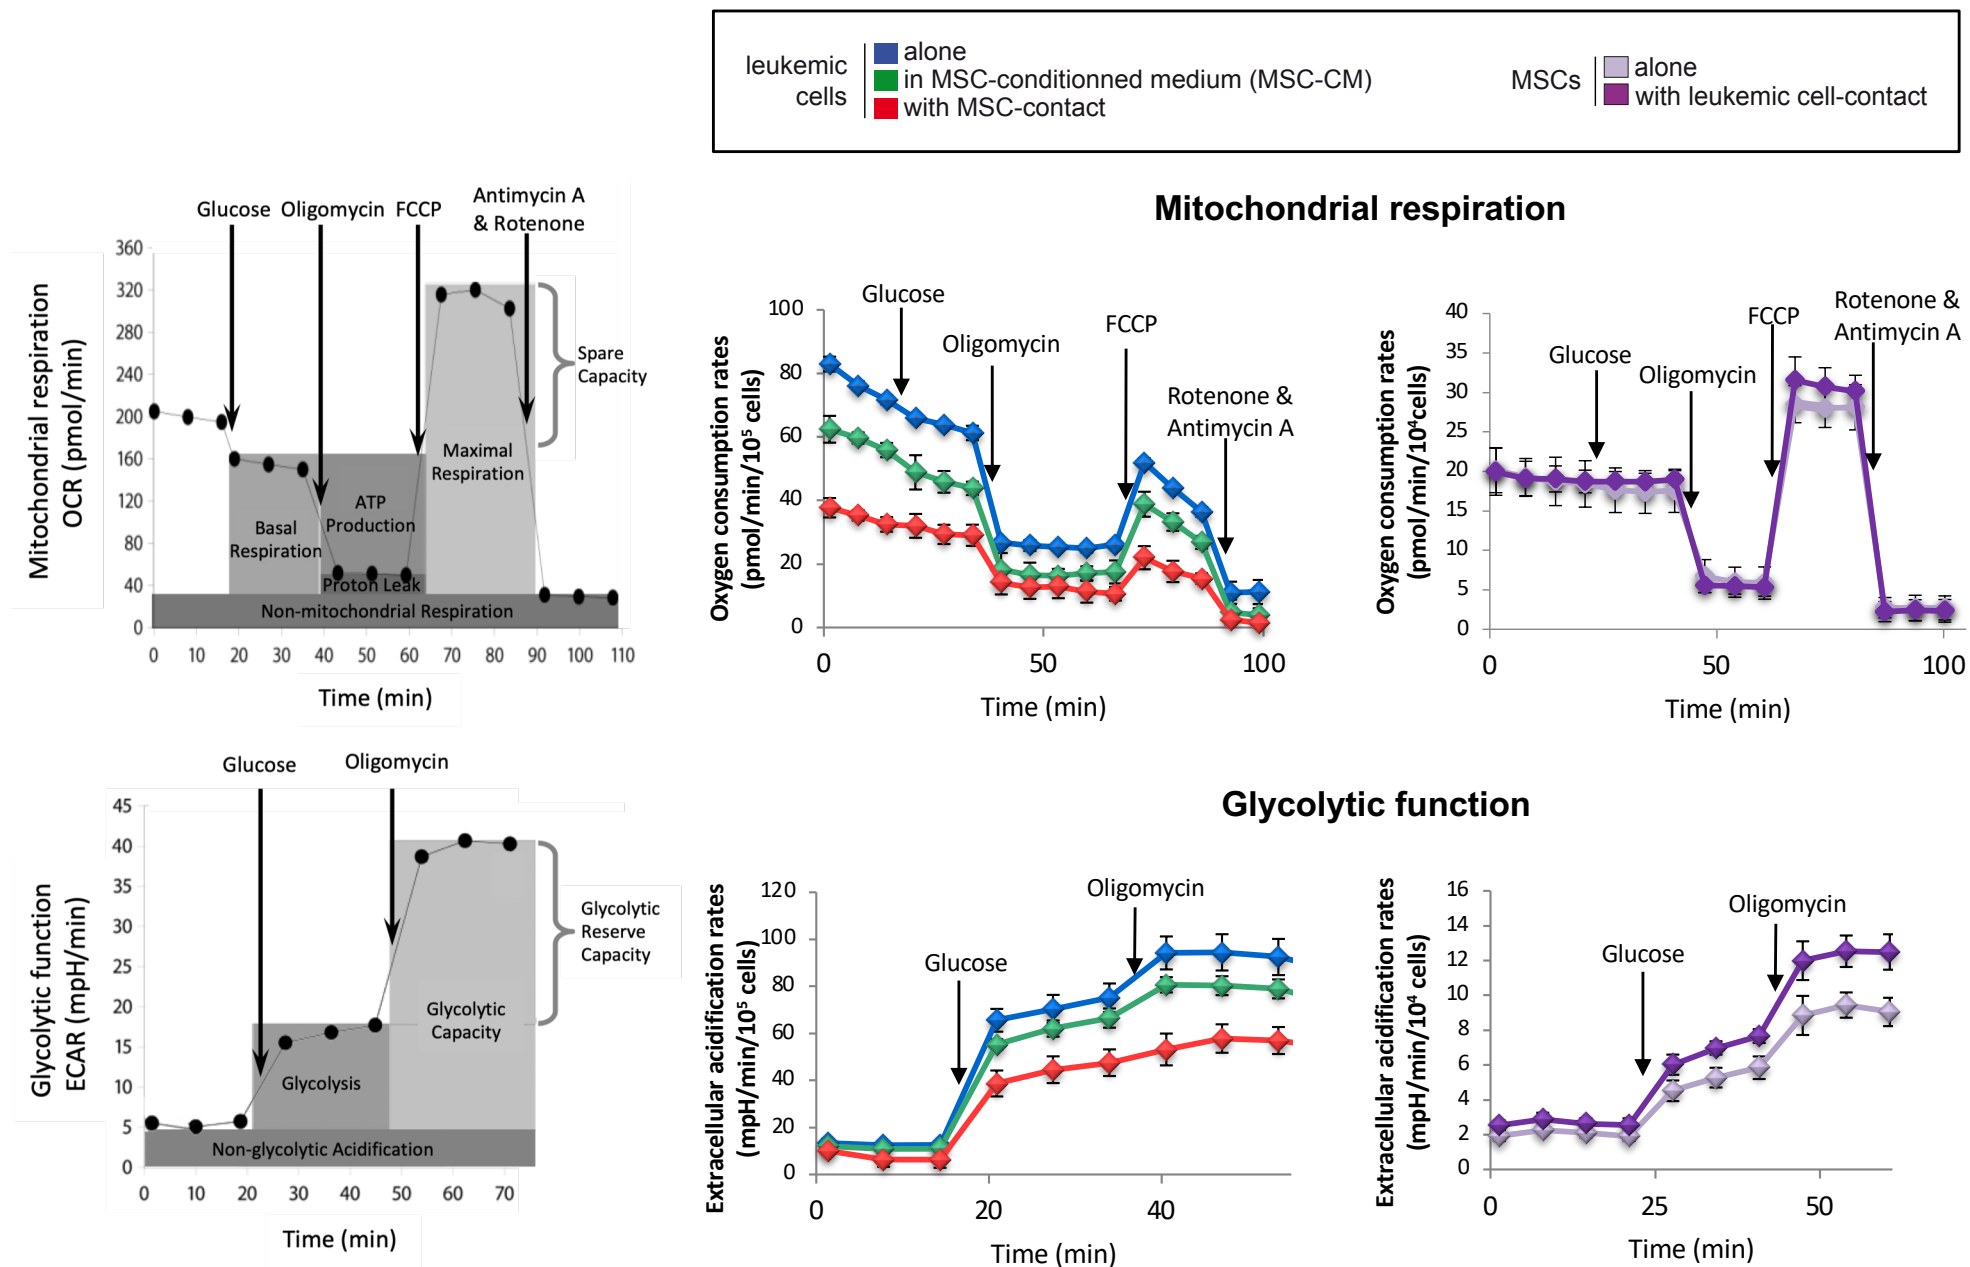

Figure S1

Supplement: s1 [file s1]

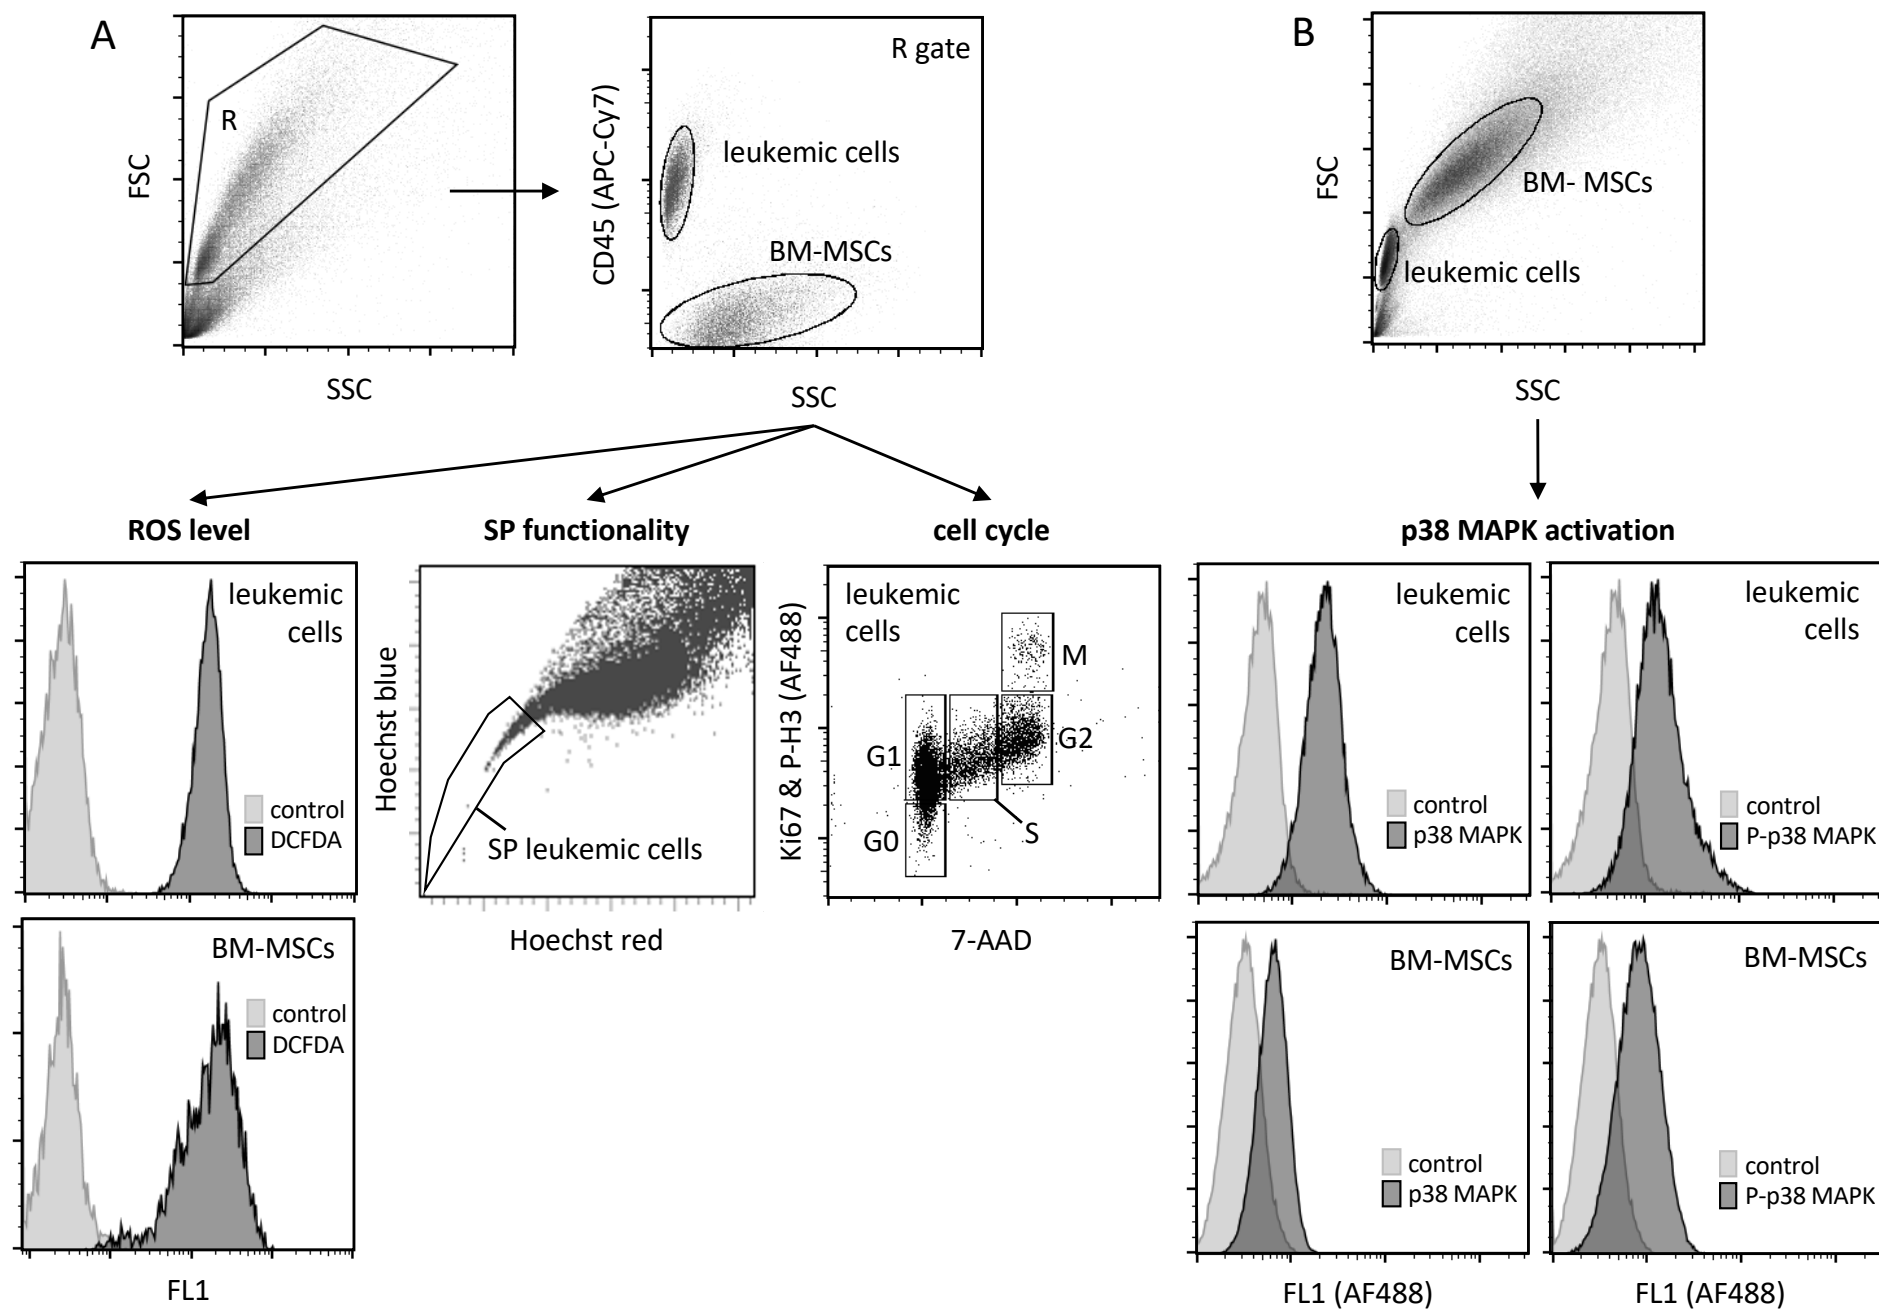

Figure S4

Supplement: s1 [file s1]

## ROS levels in stromal cell lines

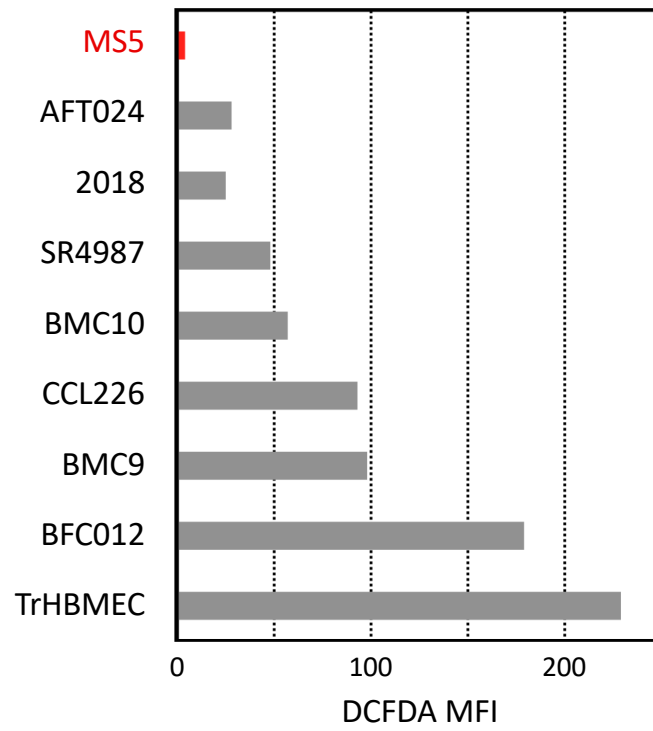

Figure S2

Supplement: s1 [file s1]
